# Supplementary material for: Loss of microRNA-23–27–24 clusters in skeletal muscle is not influential in skeletal muscle development and exercise-induced muscle adaptation
Source: PubMed Central journal article supplement (PMC6355808; doi:10.1038/s41598-018-37765-3), 2019-01-31
Supplement: 41598_2018_37765_MOESM1_ESM.pdf [file 41598_2018_37765_MOESM1_ESM.pdf]

## Supplementary information

### **Loss of microRNA-23–27–24 clusters in skeletal muscle is not influential in skeletal muscle development and exercise-induced muscle adaptation.**

Minjung Lee<sup>1\*</sup>, Shogo Wada<sup>1\*</sup>, Satoshi Oikawa<sup>2</sup>, Katsuhiko Suzuki<sup>3</sup>, Takashi Ushida<sup>1</sup>, Takayuki Akimoto<sup>1,3</sup>

<sup>1</sup> Division of Regenerative Medical Engineering, Center for Disease Biology and Integrative Medicine, Graduate School of Medicine, The University of Tokyo, Tokyo 113-0033, Japan

<sup>2</sup> Graduate School of Comprehensive Human Science, University of Tsukuba, Ibaraki 305-8571, Japan

<sup>3</sup> Faculty of Sport Sciences, Waseda University, Saitama 359-1192, Japan

The current affiliation of S.W. is the Department of Medicine and Cardiovascular Institute, Perelman School of Medicine, University of Pennsylvania, Philadelphia, PA, USA.

\*: equal contributions

Correspondence and requests for materials should be addressed to T.A. (e-mail: [axi@waseda.jp](mailto:axi@waseda.jp))

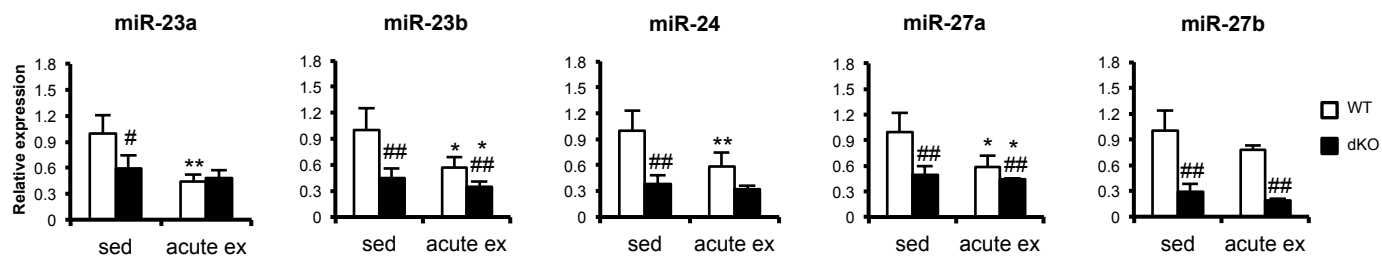

**Supplementary Figure S1. Mature miRNAs in miR-23a/b clusters in skeletal muscle after an acute bout of wheel running.**

WT, wildtype. dKO, miR-23a/b clusters double KO. sed, sedentary group. acute ex, an acute bout of wheel running group.

#P < 0.05 and ##P < 0.01 compared with WT. \*P < 0.05 and \*\*P < 0.01 compared with sed. Data are means  $\pm$  SE (n = 3–5).

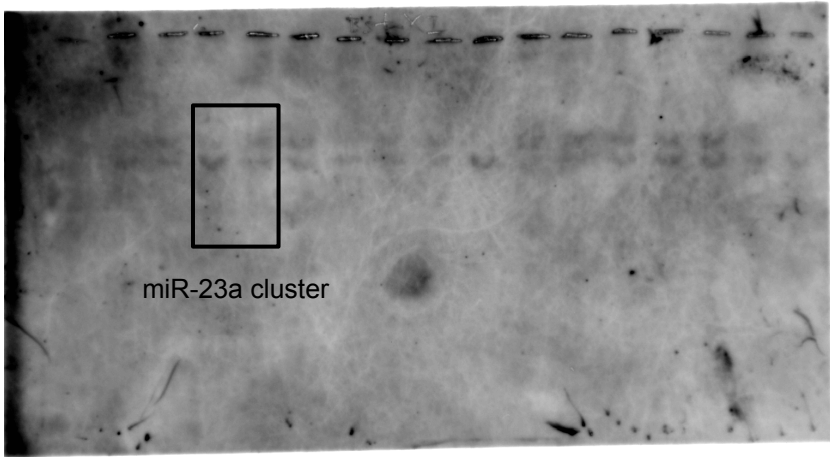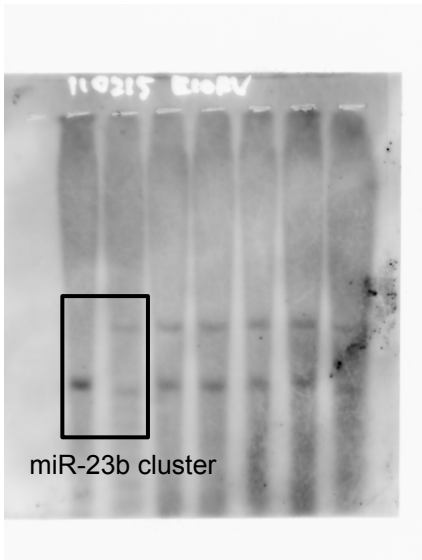

**Supplementary Figure S2.** Representative blot images displayed in Fig. 1B

Fig. 2A

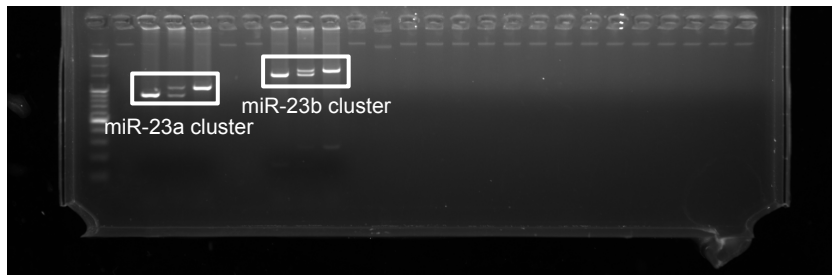

Fig. 2B

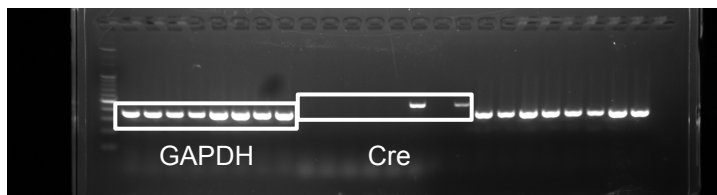

Fig. 2C

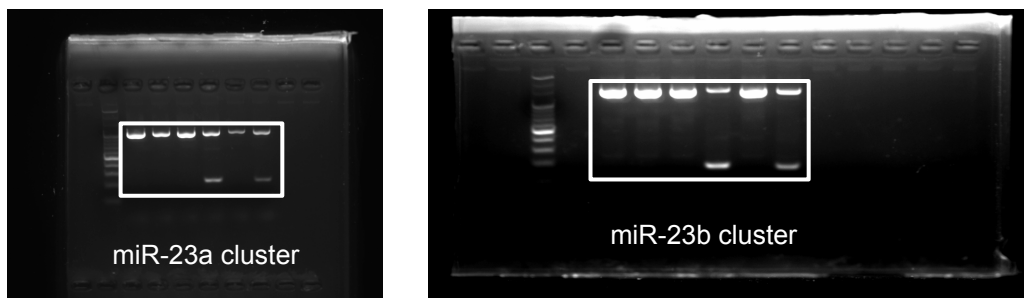

**Supplementary Figure S3.** Representative gel images displayed in Fig. 2

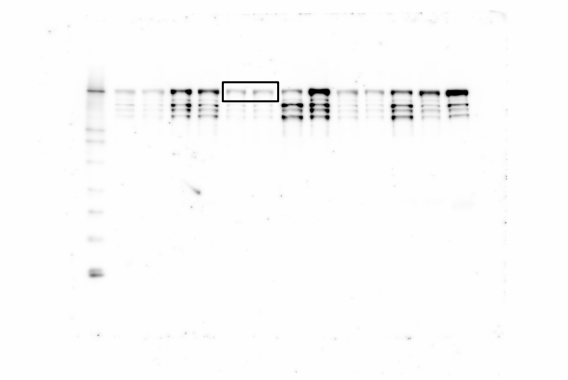

MyHC IIA

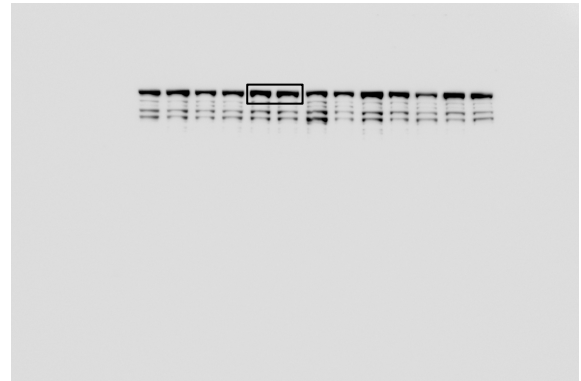

MyHC IIB

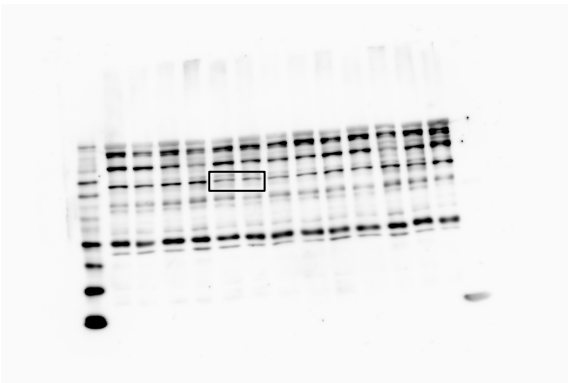

PGC1- $\alpha$

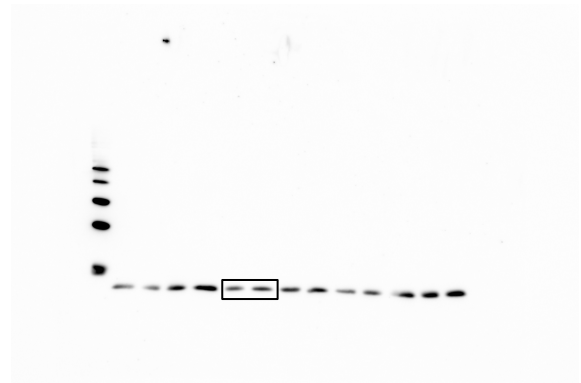

COX IV

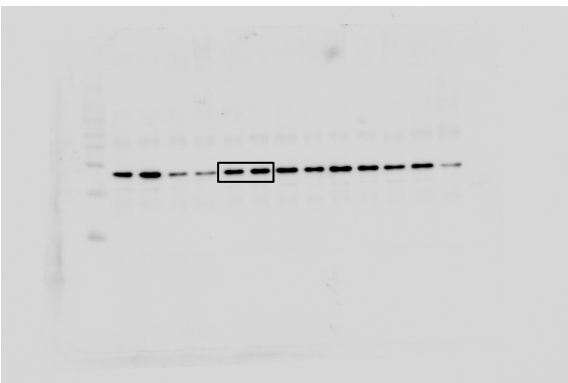

GAPDH

**Supplementary Figure S4.** Representative blot images displayed in Fig. 3A

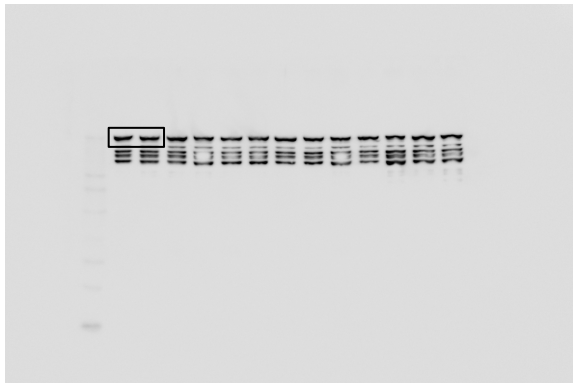

MyHC I

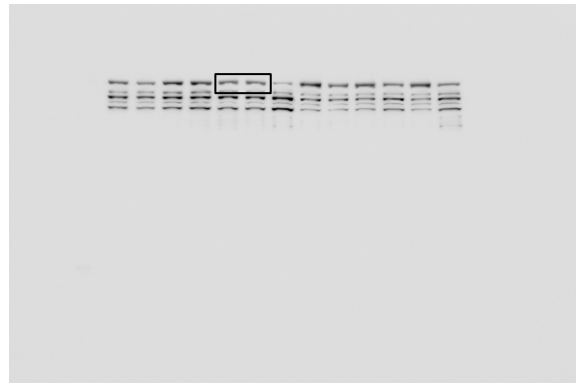

MyHC IIA

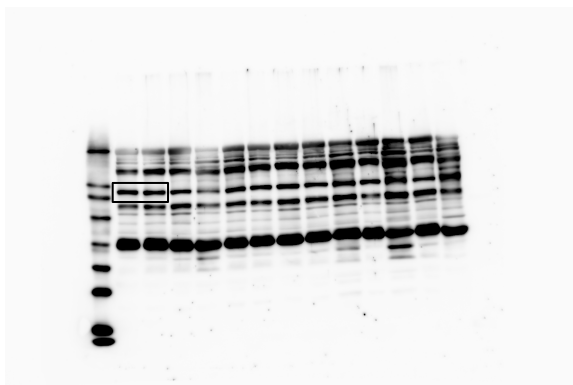

PGC1- $\alpha$

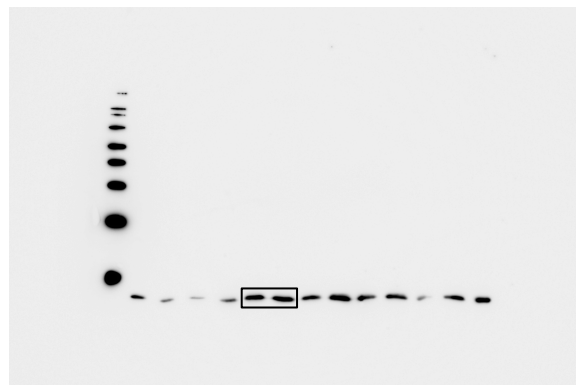

COX IV

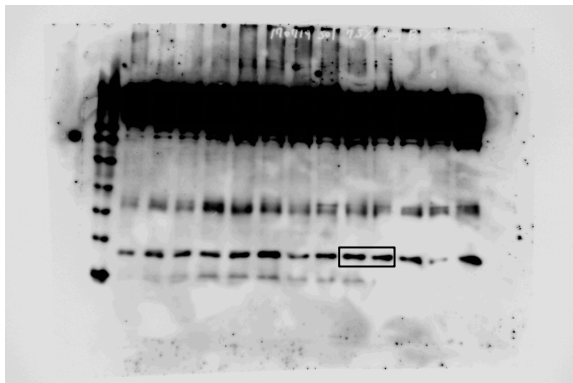

GAPDH

Supplementary Figure S5. Representative blot images displayed in Fig. 3C

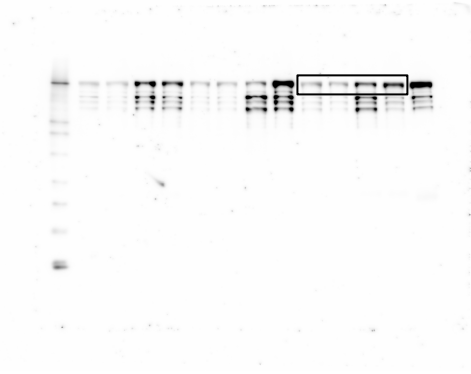

MyHC IIA

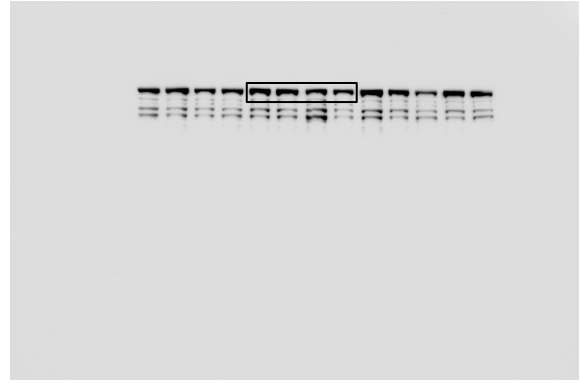

MyHC IIB

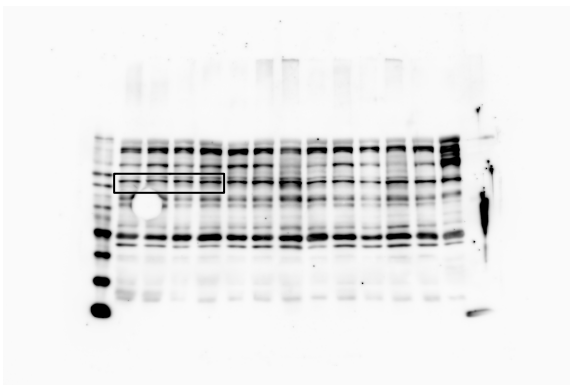

PGC1- $\alpha$

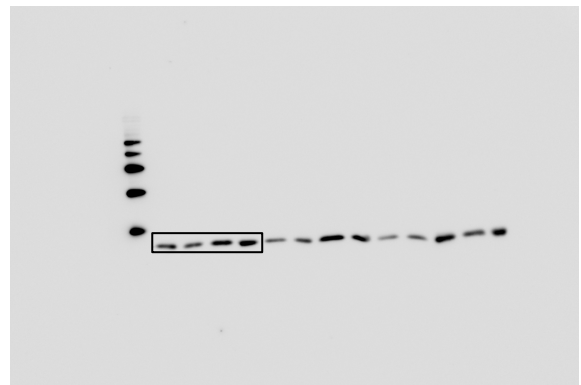

COX IV

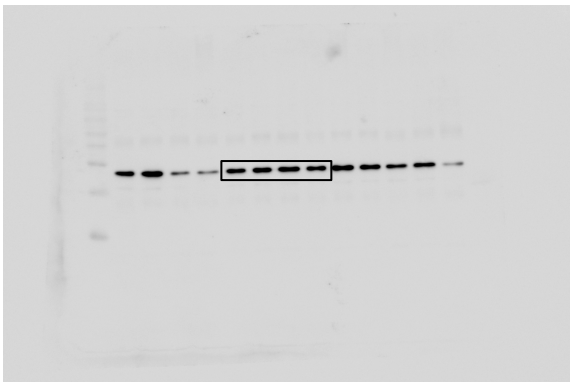

GAPDH

**Supplementary Figure S6.** Representative blot images displayed in Fig. 5A
